# Supplementary material
Source: publisher site journal article supplement (https://www.dovepress.com/article/377174)
Supplement: Supplementary file 1 [file get_supplementary_file.php]

## **Characterization of biologic initiation in a real-world severe asthma cohort with high exposure to oral systemic steroids**

Wenjia Chen, PhD<sup>1</sup>; Mohsen Sadatsafavi, MD, PhD<sup>2</sup>; Trung N. Tran, MD, PhD<sup>3</sup>; Ruth B. Murray, PhD<sup>5</sup>; Chong Boon Nigel Wong, B.Soc.Sci. (Hons)<sup>1</sup>; Nasloon Ali, PhD<sup>4,5</sup>; Cono Ariti, MSc<sup>4,5</sup>; Esther Garcia Gil, MD<sup>6</sup>; Anthony Newell, PhD<sup>4,7</sup>; Marianna Alacqua, MD, PhD<sup>8</sup>; Mona Al-Ahmad, MD, FRCPC<sup>9</sup>; Alan Altraja, MD, PhD<sup>10</sup>; Riyadh Al-Lehebi, MD, FRCPC<sup>11,12</sup>; Mohit Bhutani, MD, FRCPC<sup>13</sup>; Leif Bjermer, MD, PhD<sup>14</sup>; Anne Sofie Bjerrum, MD, PhD<sup>15</sup>; Arnaud Bourdin, MD, PhD<sup>16</sup>; Lakmini Bulathsinhala, MPH<sup>4,5</sup>; Anna von Bülow, MD, PhD<sup>17</sup>; John Busby, PhD<sup>18</sup>; Giorgio Walter Canonica, MD<sup>19,20</sup>; Victoria Carter, BSc<sup>4,5</sup>; George C. Christoff, MD, PhD, MPH<sup>21</sup>; Borja G. Cosio, MD, PhD<sup>22</sup>; Richard W. Costello, MB, MD, FRCPI<sup>23</sup>; J. Mark FitzGerald, MD, FRCPC<sup>24</sup>; João A. Fonseca, MD, PhD<sup>25</sup>; Kwang Ha Yoo, MD, PhD<sup>26</sup>; Liam G. Heaney, MD<sup>27</sup>; Enrico Heffler, MD, PhD<sup>19,20</sup>; Mark Hew, MBBS, PhD, FRACP<sup>28,29</sup>; Ole Hilberg, MD, DMSc<sup>30</sup>; Flavia Hoyte, MD<sup>31,32</sup>; Takashi Iwanaga, MD, PhD<sup>33</sup>; David J. Jackson, MBBS, MRCP (UK), PhD<sup>34,35</sup>; Rupert C. Jones, MD<sup>36</sup>; Mariko Siyue Koh, MBBS, MRCP (UK), FCCP<sup>37,38</sup>; Piotr Kuna, MD, PhD<sup>39</sup>; Désirée Larenas-Linnemann, MD, FAAAAI, Dist.Intl.FACAAI<sup>40</sup>; Sverre Lehmann, MD, PhD<sup>41</sup>; Lauri A. Lehtimäki, MD, PhD<sup>42,43</sup>; Juntao Lyu, PhD<sup>4,7</sup>; Bassam Mahboub, MD<sup>44,45</sup>; Jorge Maspero, PhD<sup>46,47</sup>; Andrew N. Menzies-Gow, PhD, FRCP<sup>48</sup>; Concetta Sirena, PhD<sup>49</sup>; Nikolaos G. Papadopoulos, MD, PhD, FRCP<sup>50,51</sup>; Andriana I. Papaioannou, MD, PhD<sup>52</sup>; Luis Perez-de-Llano, MD, PhD<sup>53,54</sup>; Diahn-Warng Perng Steve, MD, PhD<sup>55,56</sup>; Matthew Peters, MD, PhD<sup>57</sup>; Paul E. Pfeffer MRCP(UK), PhD<sup>58,59</sup>; Celeste M. Porsbjerg, MD, PhD<sup>60</sup>; Todor A. Popov, MD, PhD<sup>61</sup>; Chin Kook Rhee, MD, PhD<sup>62</sup>; Sundeep Salvi, MD, PhD<sup>63</sup>; Camille Taillé, MD, PhD<sup>64</sup>; Christian Taube, MD<sup>65</sup>; Carlos A. Torres-Duque, MD<sup>66</sup>; Charlotte S. Ulrik, MD, DMSc, FERS<sup>67</sup>; Seung Won Ra, MD, PhD<sup>68</sup>; Eileen Wang MD, MPH<sup>31,32</sup>; Michael E. Wechsler, MD<sup>69</sup>; David B. Price, FRCGP<sup>4,5,70</sup>

**Supplementary Table 1: A summary of how each registry diagnoses asthma and categorizes severe asthma**

| Country          | Severe Asthma Definition*                                                                                                                                             | Diagnosis Confirmation                                                    | Age of asthma onset                                 |  |
|------------------|-----------------------------------------------------------------------------------------------------------------------------------------------------------------------|---------------------------------------------------------------------------|-----------------------------------------------------|--|
| <b>Argentina</b> | ERS/ATS Task Force guidelines on assessment and treatment of severe asthma, based on GINA guidelines for asthma control; a stepwise approach towards pharmacotherapy. | 1) Clinical diagnosis of severe asthma                                    | 1) Age at which asthma is first diagnosed           |  |
| <b>Bulgaria</b>  |                                                                                                                                                                       | OR                                                                        | OR                                                  |  |
| <b>Canada</b>    |                                                                                                                                                                       | 2) Clinical opinion by physicians (according to severe asthma definition) | 2) Age at which asthma symptoms were first observed |  |
| <b>Greece</b>    |                                                                                                                                                                       |                                                                           | (Whichever occurred first)                          |  |
| <b>India</b>     |                                                                                                                                                                       |                                                                           |                                                     |  |
| <b>Ireland</b>   |                                                                                                                                                                       |                                                                           |                                                     |  |
| <b>Japan</b>     |                                                                                                                                                                       |                                                                           |                                                     |  |
|                  |                                                                                                                                                                       | 1) GINA Step 5 if:                                                        |                                                     |  |
|                  |                                                                                                                                                                       | At least one of the following:                                            |                                                     |  |
|                  |                                                                                                                                                                       | a) Anti-immunoglobulin E (omalizumab)                                     |                                                     |  |
|                  | b) Anti-interleukin-5 (mepolizumab, reslizumab, benralizumab)                                                                                                         |                                                                           |                                                     |  |
|                  | c) Anti-interleukin-4 (dupilumab)                                                                                                                                     |                                                                           |                                                     |  |
|                  | d) Bronchial thermoplasty,                                                                                                                                            |                                                                           |                                                     |  |
|                  | e) Maintenance oral corticosteroids.                                                                                                                                  |                                                                           |                                                     |  |

|                             |                                                                                                                                                                                                                                                                                                                                                                                                                                                                                                                                                                                                                                                                                                                                                                                |  |  |
|-----------------------------|--------------------------------------------------------------------------------------------------------------------------------------------------------------------------------------------------------------------------------------------------------------------------------------------------------------------------------------------------------------------------------------------------------------------------------------------------------------------------------------------------------------------------------------------------------------------------------------------------------------------------------------------------------------------------------------------------------------------------------------------------------------------------------|--|--|
| <b>Kuwait</b>               | OR                                                                                                                                                                                                                                                                                                                                                                                                                                                                                                                                                                                                                                                                                                                                                                             |  |  |
| <b>Saudi Arabia</b>         | 2)                                                                                                                                                                                                                                                                                                                                                                                                                                                                                                                                                                                                                                                                                                                                                                             |  |  |
| <b>South Korea</b>          | a) GINA Step 4 if:<br><br>Medium to High dose ICS plus second controller (LABA AND/OR LAMA)<br><br>WITH/WITHOUT Extra controller (e.g. LTRA AND/OR theophylline)                                                                                                                                                                                                                                                                                                                                                                                                                                                                                                                                                                                                               |  |  |
| <b>Taiwan</b>               | AND                                                                                                                                                                                                                                                                                                                                                                                                                                                                                                                                                                                                                                                                                                                                                                            |  |  |
| <b>United Arab Emirates</b> | b) Uncontrolled asthma if at least one of the following is fulfilled: <ul style="list-style-type: none"> <li>• Poor symptom control: <ul style="list-style-type: none"> <li>○ ACQ[1] &gt;1.5, OR</li> <li>○ ACT[2] &lt;20, OR</li> <li>○ Having at least 3 of the following during the past 4 weeks (NAEPP/GINA guidelines): <ul style="list-style-type: none"> <li>• Daytime symptoms &gt;twice/week,</li> <li>• Night waking due to asthma,</li> <li>• Reliever needed &gt;twice/week,</li> <li>• Activity limitation due to asthma</li> </ul> </li> </ul> </li> <li>• Airflow limitation: FEV<sub>1</sub> &lt; 80% predicted (in the face of reduced FEV<sub>1</sub>/FVC following a withhold of short and long-acting bronchodilators, i.e. Pre-bronchodilator)</li> </ul> |  |  |

|                  |                                                                                                                                                                                                                                                                                                                                                                                                                                                                                                                                                                                                                                                                                                           |                                                                                                                                                                                                                       |                                                                                                                                           |
|------------------|-----------------------------------------------------------------------------------------------------------------------------------------------------------------------------------------------------------------------------------------------------------------------------------------------------------------------------------------------------------------------------------------------------------------------------------------------------------------------------------------------------------------------------------------------------------------------------------------------------------------------------------------------------------------------------------------------------------|-----------------------------------------------------------------------------------------------------------------------------------------------------------------------------------------------------------------------|-------------------------------------------------------------------------------------------------------------------------------------------|
|                  | <ul style="list-style-type: none"> <li>• Serious exacerbations: at least one hospitalization, ICU stay or mechanical ventilation in the previous year</li> <li>• Frequent severe asthma exacerbations: two or more short courses of systemic corticosteroids (&gt;3 days course each in the previous year)</li> </ul>                                                                                                                                                                                                                                                                                                                                                                                     |                                                                                                                                                                                                                       |                                                                                                                                           |
| <b>Australia</b> | <p>1) Uncontrolled on GINA Step 4 Treatment</p> <p>-ERS/ATS guideline for uncontrolled asthma:</p> <p>a) Poor symptom control: ACQ consistently &gt;1.5, ACT &lt; 20 (or 'not well controlled' by NAEPP/GINA guidelines) AND/OR</p> <p>b) Frequent severe exacerbations: 2 or more bursts of systemic CSs (&gt;3 days each) in the previous year AND/OR</p> <p>c) Serious exacerbations: at least one hospitalization, ICU stay or mechanical ventilation in the previous year AND/OR</p> <p>d) Persistent airflow limitation: FEV<sub>1</sub> &lt; 80% predicted (in the face of reduced FEV<sub>1</sub>/FVC following a withhold of short and long acting bronchodilators (i.e. PRE-bronchodilator)</p> | <p>Airflow Obstruction:</p> <p>1) BDR &gt; 200 mL and/or &gt; 12%</p> <p>2) AHR in response to any standard challenge agent</p> <p>3) Peak flow variability &gt;12%</p> <p>4) FEV<sub>1</sub> Variability &gt;12%</p> | <p>1) Age when asthma symptoms began</p> <p>2) Age at which asthma was first diagnosed</p> <p>3) Age of first use of asthma treatment</p> |
| <b>Colombia</b>  | <p>1) GINA Step 4 uncontrolled or GINA Step 5</p> <p>-ERS/ATS guideline for uncontrolled asthma:</p> <p>a) Poor symptom control: ACQ consistently &gt;1.5, ACT &lt; 20 (or 'not well controlled' by NAEPP/GINA guidelines) AND/OR</p>                                                                                                                                                                                                                                                                                                                                                                                                                                                                     | <p>1) A clinical diagnosis of asthma plus functional confirmation:</p> <p>a) BDR &gt; 200 mL and &gt; 12%, or</p>                                                                                                     | <p>1) Age of onset of asthmatic symptoms</p>                                                                                              |

|                |                                                                                                                                                                                                                                                                                                                                                                                                                                                                                          |                                                                                                                                                                                                                                                                     |                                               |
|----------------|------------------------------------------------------------------------------------------------------------------------------------------------------------------------------------------------------------------------------------------------------------------------------------------------------------------------------------------------------------------------------------------------------------------------------------------------------------------------------------------|---------------------------------------------------------------------------------------------------------------------------------------------------------------------------------------------------------------------------------------------------------------------|-----------------------------------------------|
|                | <p>b) Frequent severe exacerbations: 2 or more bursts of systemic CSs (&gt;3 days each) in the previous year AND/OR</p> <p>c) Serious exacerbations: at least one hospitalization, ICU stay or mechanical ventilation in the previous year AND/OR</p> <p>d) Persistent airflow limitation: FEV<sub>1</sub>&lt; 80% predicted (in presence of reduced FEV<sub>1</sub>/FVC following a withhold of short and long-acting bronchodilators</p>                                               | <p>b) AHR in response to any standard challenge agent. or</p> <p>c) FEV<sub>1</sub> Variability &gt;12% or PEF variability &gt; 20%</p> <p>2) If functional confirmation was not obtained, a clinical diagnosis of asthma done by a pulmonologist was accepted.</p> | <p>2) Before age of 12 or after age of 12</p> |
| <b>Denmark</b> | <p>1) GINA Step 5 Treatment</p>                                                                                                                                                                                                                                                                                                                                                                                                                                                          | NIL                                                                                                                                                                                                                                                                 | Age at patient's first asthma symptoms        |
| <b>Mexico</b>  | <p>2) Uncontrolled on GINA Step 4 Treatment</p> <p>-ERS/ATS guideline for uncontrolled asthma:</p> <p>a) Poor symptom control: ACQ consistently &gt;1.5, ACT&lt; 20 (or 'not well controlled' by NAEPP/GINA guidelines) AND/OR</p> <p>b) Frequent severe exacerbations: 2 or more bursts of systemic CSs (&gt;3 days each) in the previous year AND/OR</p> <p>c) Serious exacerbations: at least one hospitalization, ICU stay or mechanical ventilation in the previous year AND/OR</p> |                                                                                                                                                                                                                                                                     |                                               |

|              |                                                                                                                                                                                                                                                                                                                |                                                                                                                          |                                                   |
|--------------|----------------------------------------------------------------------------------------------------------------------------------------------------------------------------------------------------------------------------------------------------------------------------------------------------------------|--------------------------------------------------------------------------------------------------------------------------|---------------------------------------------------|
|              | d) Persistent airflow limitation: FEV <sub>1</sub> < 80% predicted (in the face of reduced FEV <sub>1</sub> /FVC following a withhold of short and long-acting bronchodilators (i.e. PRE-bronchodilator)                                                                                                       |                                                                                                                          |                                                   |
| <b>Italy</b> | 1) ERS/ATS Severe Asthma definition:<br><br>Asthma which requires treatment with guidelines suggested medications for GINA steps 4–5 asthma for the previous year or systemic CS for ≥50% of the previous year to prevent it from becoming “uncontrolled” or which remains “uncontrolled” despite this therapy | 1) Method of diagnosis:<br><br>(a) Methacholine<br><br>(b) Bronchodilation<br><br>(c) Functional Respiratory Variability | 1) Age of asthma onset<br><br>2) Age at diagnosis |
| <b>Spain</b> | 1) GEMA Step 5 or Step 6 Treatment<br><br>2) Uncontrolled on GEMA Step 4 Treatment:<br><br>a) Symptoms of severe asthma<br><br>b) Frequent exacerbations that require the use of systemic corticosteroids                                                                                                      | NIL                                                                                                                      | Year of asthma diagnosis                          |
| <b>UK</b>    | 1) ERS/ATS Severe Asthma definition:<br><br>Asthma which requires treatment with guidelines suggested medications for GINA steps 4–5 asthma for the previous year or systemic CS for ≥50% of the previous year to prevent it from becoming “uncontrolled” or which remains “uncontrolled” despite this therapy | NIL                                                                                                                      | Date first seen by the chest physician            |

\*All patients included in the current study met ISAR's standardized definition of severe asthma

ACQ: Asthma Control Questionnaire; ACT: Asthma Control Test; AHR: airway hyper-responsiveness; ATS: American Thoracic Society; BDR: bronchodilator response; ERS: European Respiratory Society; FEV<sub>1</sub>: forced expiratory volume in one second; FVC: forced vital capacity; GEMA: Spanish guideline on the management of asthma; GINA: Global Initiative for Asthma; CS: corticosteroid; ICS: inhaled corticosteroid; ICU: intensive care unit; LABA: long-acting  $\beta_2$ -agonist; LAMA: long-acting muscarinic receptor antagonist; LTRA: leukotriene receptor antagonist; NAEPP: National Asthma Education and Prevention Program; PEF: peak expiratory flow rate;

**Supplementary Table 2. Baseline demographic variables**

| Variable Name†                 | Description                                                                                                                                                                                                                                                                                                                                                                                    |
|--------------------------------|------------------------------------------------------------------------------------------------------------------------------------------------------------------------------------------------------------------------------------------------------------------------------------------------------------------------------------------------------------------------------------------------|
| Age<br>Sex<br>Height<br>Weight | Patient age in years, gender, height measurement in metres (m) and weight measurement in kilograms (kg)                                                                                                                                                                                                                                                                                        |
| Body Mass Index                | Defined as the ratio of weight (kg) to squared height (m <sup>2</sup> ).<br>Categorized as: <ul style="list-style-type: none"> <li>● Underweight: &lt; 18.5 kg/m<sup>2</sup>,</li> <li>● Normal weight: ≥ 18.5 kg/m<sup>2</sup> and &lt; 25 kg/m<sup>2</sup>,</li> <li>● Overweight: ≥ 25 kg/m<sup>2</sup> and &lt; 30 kg/m<sup>2</sup> and</li> <li>● Obese: ≥ 30 kg/m<sup>2</sup></li> </ul> |
| Ethnicity                      | Caucasian, Asian, African, Mixed, Other, Unknown                                                                                                                                                                                                                                                                                                                                               |
| Smoking status                 | Categorised as non-smoker, current smoker, or ex-smoker                                                                                                                                                                                                                                                                                                                                        |
| Pack years                     | Defined as the number of cigarettes smoked per day divided by 20 and multiplied by the number of years smoked                                                                                                                                                                                                                                                                                  |

†All variables are measured at baseline which is the first patient visit where data are collected for ISAR



**Supplementary Table 3. Baseline clinical variables**

| Variable Name†                                    | Description                                                                                                                                                                                                  |
|---------------------------------------------------|--------------------------------------------------------------------------------------------------------------------------------------------------------------------------------------------------------------|
| <b><i>ISAR Severe Asthma Criteria</i></b>         |                                                                                                                                                                                                              |
| ISAR inclusion (GINA guidelines)[3]               | Patient on GINA Step 5 treatment<br><br>OR<br><br>Patient on GINA Step 4 treatment with<br><br>(a) Severe asthma symptoms<br><br>(b) Severe asthma exacerbations requiring systemic corticosteroids          |
| Eligibility criteria for biologic therapy         | A composite algorithm for biologic initiation eligibility                                                                                                                                                    |
| <b><i>Medical History</i></b>                     |                                                                                                                                                                                                              |
| Asthma duration                                   | Whole years or months (if less than 1 year) at which first asthma diagnosis/symptoms began to the date of entry into the study                                                                               |
| Age of asthma onset                               | Age of first asthma diagnosis/symptoms                                                                                                                                                                       |
| Number of exacerbations                           | Count of exacerbations requiring rescue oral corticosteroids in the past 1 year<br><br><ul style="list-style-type: none"> <li>● For analysis: continuous and categorical values (1,2,3,4 or more)</li> </ul> |
| Adherence                                         | Yes: Clinical Impression<br><br>Yes: Prescription Records<br><br>No                                                                                                                                          |
| Number of invasive ventilations for severe asthma | Count of episodes of invasive ventilation ever                                                                                                                                                               |
| Number of hospital admissions                     | Count of hospital admissions for asthma in the past 1 year                                                                                                                                                   |
| Number of emergency department visits             | Count of emergency department admissions for asthma in the past 1 year                                                                                                                                       |

|                                      |                                                                                                                                                                                                                                                                                     |
|--------------------------------------|-------------------------------------------------------------------------------------------------------------------------------------------------------------------------------------------------------------------------------------------------------------------------------------|
| Asthma control                       | Categorised as controlled, partly controlled, or uncontrolled according to the GINA Asthma Control Criteria/ACQ[1]/ACT[2], depending on country.                                                                                                                                    |
| Clinical management plan             | <p>Discharge to local service</p> <p>Optimisation of current treatment</p> <p>Biologic therapy</p> <p>Bronchial thermoplasty</p> <p>Maintenance oral corticosteroids</p> <p>Steroid sparing agent</p> <p>Enter into clinical trial</p> <p>Other (please specify)</p> <p>No data</p> |
| <b><i>Blood and Sputum Tests</i></b> |                                                                                                                                                                                                                                                                                     |
| Immunoglobulin E level               | <p>Counts of immunoglobulin E, measured in kilounits per litre (kU/L) or international units per litre (IU/mL)</p> <ul style="list-style-type: none"> <li>● Low: &lt; 150 IU/mL</li> <li>● Moderate: 150-400 IU/mL</li> <li>● High: &gt;400 IU/mL</li> </ul>                        |
| Blood eosinophil level               | Highest counts of blood eosinophils, measured in cells per microlitre ( $\mu\text{L}$ ).                                                                                                                                                                                            |
| Sputum eosinophil level              | Highest counts of sputum eosinophils, expressed as percentage (%) of the total cell count.                                                                                                                                                                                          |
| <b><i>Allergy Testing</i></b>        |                                                                                                                                                                                                                                                                                     |
| Skin Prick Test                      | <p>HDM, animal dander (cat, dog), pollen (tree, grass) and moulds (<i>Aspergillus</i>).</p> <ul style="list-style-type: none"> <li>● Categorised as positive reaction if &gt;4 mm is wheal diameter</li> </ul>                                                                      |

|                                                                   |                                                                                                                                                                                                                  |
|-------------------------------------------------------------------|------------------------------------------------------------------------------------------------------------------------------------------------------------------------------------------------------------------|
| SPT positive allergens                                            | Grass Mix, Weed Mix, Mould Mix, HDM, Cat, Dog, Trees, Aspergillus, Food Mix, Animal Mix, Aspergillus, Other <ul style="list-style-type: none"> <li>• Categorised as positive reaction if &gt;0.7 kU/L</li> </ul> |
| Serum Allergen Test                                               | Positive/No/No data                                                                                                                                                                                              |
| SAT positive allergens                                            | Dust Mite (eg: D. Pteronyssinus), Grass mix, Cat hair, Mould mix, Dog hair, Aspergillus, Other (Please Specify)                                                                                                  |
| <b><i>Spirometry</i></b>                                          |                                                                                                                                                                                                                  |
| Pre-bronchodilator FEV <sub>1</sub>                               | FEV <sub>1</sub> measured in litres (L), before administering bronchodilator                                                                                                                                     |
| Pre-Bronchodilator FVC                                            | FVC measured in litres (L) before administering bronchodilator                                                                                                                                                   |
| Post-bronchodilator FEV <sub>1</sub>                              | FEV <sub>1</sub> measured in litres (L), after administering bronchodilator                                                                                                                                      |
| Post-Bronchodilator FVC                                           | FVC measured in litres (L), after administering bronchodilator                                                                                                                                                   |
| Pre-bronchodilator FEV <sub>1</sub><br>(percentage of predicted)  | Measured pre-bronchodilator FEV <sub>1</sub> as a percentage (%) of predicted FEV <sub>1</sub>                                                                                                                   |
| Pre-bronchodilator FVC<br>(percentage of predicted)               | Measured pre-bronchodilator FVC as a percentage (%) of predicted FVC                                                                                                                                             |
| Post-bronchodilator FEV <sub>1</sub><br>(percentage of predicted) | Measured post-bronchodilator FEV <sub>1</sub> as a percentage (%) of predicted FEV <sub>1</sub>                                                                                                                  |
| Post-Bronchodilator FVC<br>(percentage of predicted)              | Measured post-bronchodilator FVC as a percentage (%) of predicted FVC                                                                                                                                            |
| FEV <sub>1</sub> /FVC ratio pre-bronchodilator                    |                                                                                                                                                                                                                  |
| FEV <sub>1</sub> /FVC ratio post-bronchodilator                   |                                                                                                                                                                                                                  |

|                                                                                   |                                                                                                                                                                                                                           |
|-----------------------------------------------------------------------------------|---------------------------------------------------------------------------------------------------------------------------------------------------------------------------------------------------------------------------|
| FeNO test                                                                         | Measurements of FeNO concentration in exhaled breath, measured in ppb at a flow rate of 50mL/s. Categorized as: <ul style="list-style-type: none"> <li>• Low FeNO: &lt;25ppb and</li> <li>• High FeNO: ≥45 ppb</li> </ul> |
| PC20 Methacholine/Histamine challenge test                                        | Methacholine challenge test (also known as bronchoprovocation test) measured in mg/ml.                                                                                                                                    |
| <b><i>Prevalent and New Occurrence of SCS-related Comorbidity‡</i></b>            |                                                                                                                                                                                                                           |
| Anxiety/depression                                                                | Self reported or diagnosis for Anxiety/depression                                                                                                                                                                         |
| Osteoporosis                                                                      | Self reported or diagnosis for Osteoporosis                                                                                                                                                                               |
| Diabetes                                                                          | Self reported or diagnosis for Diabetes                                                                                                                                                                                   |
| Peptic ulcer                                                                      | Self reported or diagnosis for Peptic ulcer                                                                                                                                                                               |
| Pneumonia                                                                         | Self reported or diagnosis for Pneumonia                                                                                                                                                                                  |
| Serious infection                                                                 | One or more infections requiring hospitalization, invasive or non-invasive ventilation, IV antibiotics, or resulting in a fatal outcome                                                                                   |
| <b><i>Prevalent and New Occurrence of Potentially T2-related Comorbidity‡</i></b> |                                                                                                                                                                                                                           |
| Allergic rhinitis                                                                 | Self-reported or diagnosis for Allergic rhinitis                                                                                                                                                                          |
| Chronic rhinosinusitis                                                            | Self-reported or diagnosis for Chronic rhinosinusitis                                                                                                                                                                     |
| Eczema                                                                            | Self-reported or diagnosis for Eczema                                                                                                                                                                                     |
| Nasal polyps                                                                      | Self-reported or diagnosis for Nasal polyps                                                                                                                                                                               |
| Obstructive sleep apnea                                                           | Self-reported or diagnosis for Obstructive sleep apnea                                                                                                                                                                    |
| Renal failure                                                                     | Self-reported or diagnosis for Renal failure                                                                                                                                                                              |
| Overall circulatory diseases                                                      | Self-reported or diagnosis for indicated history of Disease of the circulatory system                                                                                                                                     |

|                                            |                                                                                                                                |
|--------------------------------------------|--------------------------------------------------------------------------------------------------------------------------------|
| Heart Failure                              | Self-reported or diagnosis for Indicated history of heart failure                                                              |
| Myocardial infarction                      | Self-reported or diagnosis for Myocardial infarction                                                                           |
| Thromboembolism                            | Self-reported or diagnosis for Thromboembolism                                                                                 |
| Stroke                                     | Self-reported or diagnosis for Stroke                                                                                          |
| Pulmonary embolism                         | Self-reported or diagnosis for Pulmonary embolism                                                                              |
| Cancer                                     | Self-reported or diagnosis for Cancer                                                                                          |
| <b>Medication</b>                          |                                                                                                                                |
| Long-term OCS (Y/N, daily dose, duration)  | Prescription of OCS for maintenance                                                                                            |
| ICS+LABA (Y/N, daily dose, duration)       | Prescription for ICS+LABA, expected for all                                                                                    |
| ICS (Y/N, daily dose, duration)            | Prescription for ICS                                                                                                           |
| LABA (Y/N, duration)                       | Prescription for LABA                                                                                                          |
| LAMA (Y/N, duration)                       | Prescription for LAMA                                                                                                          |
| Theophylline (Y/N, duration)               | Prescription for theophylline                                                                                                  |
| LTRA (Y/N, duration)                       | Prescription for LTRA                                                                                                          |
| Anti-IgE (Y/N, duration)                   | Prescription for Anti-IgE: Omalizumab                                                                                          |
| Anti-IL5/IL5R (Y/N, type, duration)        | Prescription for Anti-IL5/5R: Mepolizumab, Reslizumab, Benralizumab                                                            |
| Anti-IL4R $\alpha$ (Y/N, type, duration)   | Prescription for Anti-IL4R $\alpha$                                                                                            |
| Macrolide Antibiotic (Y/N, type, duration) | Prescription for Macrolide Antibiotics: Azithromycin, Clarithromycin, Erythromycin, Roxithromycin, Fidaxomicin, Telithromycin, |
| Other Steroid Sparing Agent                | Prescription for Other Steroid Sparing Agent                                                                                   |

†All variables are measured at baseline which is the first patient visit where data are collected for ISAR

‡time to collect co-morbidity data is relatively short. Only co-morbidities with substantial data will be analyzed for this study

ACT: Asthma Control Test; ACQ: Asthma Control Questionnaire; FeNO: fractional exhaled nitric oxide; FEV<sub>1</sub>: forced expiratory volume in one second; FVC: forced vital capacity; GINA: Global Initiative for Asthma; HDM: house dust mite; ICS: inhaled corticosteroid; IgE: immunoglobulin E; IL-4R $\alpha$ : interleukin-4 receptor  $\alpha$ ; IL-5/5R: interleukin-5/5 receptor; ISAR: International Severe Asthma Registry; LABA: long-acting  $\beta$ 2-agonist; LAMA: long-acting muscarinic antagonist; LTRA: leukotriene receptor antagonist; PC20: methacholine challenge test; OCS: oral corticosteroid; ppb: parts per billion; SAT: serological allergy test; SCS: systemic corticosteroid; SPT: skin prick test;

**Supplementary Table 4. Biologic Accessibility Score (BACS) Index§ by Country**

| <b>Country</b> | <b>No. of patients who did not initiate biologics in cohort</b> | <b>No. of patients who initiated biologics in cohort</b> | <b>Total patients in cohort</b> | <b>BACS (Anti-IL-5/5R*)</b> | <b>BACS (Anti-IgE**)</b> | <b>BACS (Anti-IL-4Rα***)</b> |
|----------------|-----------------------------------------------------------------|----------------------------------------------------------|---------------------------------|-----------------------------|--------------------------|------------------------------|
| Argentina      | 6                                                               | 1                                                        | 7                               | 61                          | 48                       | NIL                          |
| Australia      | 40                                                              | 43                                                       | 83                              | 30                          | 39                       | 48                           |
| Bulgaria       | 6                                                               | 4                                                        | 10                              | 29                          | 43                       | NIL                          |
| Canada         | 7                                                               | 23                                                       | 30                              | 49                          | 59                       | NIL                          |
| Colombia       | 17                                                              | 1                                                        | 18                              | 40                          | 55                       | 33                           |
| Denmark        | 3                                                               | 170                                                      | 173                             | 56                          | 71                       | 51                           |
| Greece         | 3                                                               | 10                                                       | 13                              | 56                          | 64                       | NIL                          |
| India          | 3                                                               | 0                                                        | 3                               | NIL                         | NIL                      | NIL                          |
| Ireland        | 8                                                               | 0                                                        | 8                               | 51                          | NIL                      | NIL                          |
| Italy          | 101                                                             | 136                                                      | 237                             | 63                          | 61                       | 74                           |
| Japan          | 15                                                              | 6                                                        | 21                              | 56                          | 59                       | 55                           |
| Kuwait         | 18                                                              | 70                                                       | 88                              | 56                          | 64                       | 38                           |
| Mexico         | 7                                                               | 9                                                        | 16                              | 74                          | 67                       | 88                           |
| Saudi Arabia   | 12                                                              | 15                                                       | 27                              | 56                          | 64                       | 64                           |
| South Korea    | 18                                                              | 2                                                        | 20                              | 72                          | 52                       | 64                           |
| Spain          | 3                                                               | 7                                                        | 10                              | 58                          | 58                       | NIL                          |
| Taiwan         | 18                                                              | 4                                                        | 22                              | 32                          | 61                       | NIL                          |
| UAE            | 3                                                               | 0                                                        | 3                               | NIL                         | NIL                      | NIL                          |
| UK             | 128                                                             | 495                                                      | 623                             | 43                          | 55                       | NIL                          |

IgE: immunoglobulin E; IL-4R $\alpha$ : interleukin-4 receptor  $\alpha$ ; IL-5/5R: interleukin-5/5 receptor; UAE: United Arab Emirates; UK: United Kingdom

§A biologic accessibility score (BACS) has been developed by Porsbjerg and colleagues[4] to determine the ease of receiving a biologic in various countries. The BACS is a composite score incorporating ten prescription access criteria (i.e. age, severe/phenotype, serum IgE, FeNO, allergic asthma, background therapy, OCS, exacerbations, asthma control, and lung function), each with a maximum score of 10 points. The calculated BACS thus reflects a country's ease of access to biologics.

\* The BACS Index included here is the average of the BACS Index for mepolizumab, reslizumab, and benralizumab.

\*\* The BACS Index included here is for omalizumab.

\*\*\* The BACS Index included here is for dupilumab.



**Supplementary Table 5. Range of exacerbation counts (over the past year) by country**

| Country      | No. of observations with exacerbation data | Minimum | 25th Percentile | Median | 75th Percentile | Maximum | Mean |
|--------------|--------------------------------------------|---------|-----------------|--------|-----------------|---------|------|
| Argentina    | 6                                          | 1       | 3               | 3      | 3               | 8       | 3.5  |
| Australia    | 15                                         | 0       | 1               | 4      | 4               | 25      | 4.3  |
| Bulgaria     | 9                                          | 2       | 2               | 4      | 4               | 8       | 3.9  |
| Canada       | 26                                         | 0       | 2               | 5      | 5               | 16      | 4.9  |
| Colombia     | 17                                         | 0       | 1               | 4      | 5               | 7       | 3.5  |
| Denmark      | 168                                        | 0       | 2               | 4      | 6               | 13      | 4.1  |
| Greece       | 13                                         | 0       | 2               | 5      | 5               | 10      | 4.4  |
| India        | 3                                          | 1       | 1               | 4      | 6               | 6       | 3.7  |
| Ireland      | 8                                          | 4       | 4.5             | 5.5    | 10              | 15      | 4.1  |
| Italy        | 229                                        | 0       | 2               | 3      | 5               | 30      | 4.1  |
| Japan        | 21                                         | 0       | 3               | 4      | 8               | 31      | 7.8  |
| Kuwait       | 88                                         | 0       | 4               | 5      | 6               | 10      | 5.0  |
| Mexico       | 16                                         | 0       | 1               | 3.5    | 4.5             | 6       | 3.1  |
| Saudi Arabia | 26                                         | 0       | 4               | 5      | 12              | 30      | 8.9  |
| South Korea  | 20                                         | 0       | 0               | 0      | 3.5             | 5       | 1.4  |
| Spain        | 10                                         | 4       | 4               | 4      | 5               | 7       | 4.7  |
| Taiwan       | 20                                         | 0       | 1.5             | 4      | 5.5             | 11      | 4.1  |
| UAE          | 3                                          | 5       | 5               | 5      | 12              | 12      | 7.3  |
| UK           | 619                                        | 0       | 3               | 5      | 8               | 24      | 5.6  |

UAE: United Arab Emirates; UK: United Kingdom

## References

- 1 Juniper EF, Bousquet J, Abetz L, *et al.* Identifying “well-controlled” and “not well-controlled” asthma using the Asthma Control Questionnaire. *Respir Med* 2006;**100**:616–21. doi:10.1016/j.rmed.2005.08.012
- 2 Nathan RA, Sorkness CA, Kosinski M, *et al.* Development of the asthma control test: a survey for assessing asthma control. *J Allergy Clin Immunol* 2004;**113**:59–65. doi:10.1016/j.jaci.2003.09.008
- 3 Global Strategy for Asthma Prevention and Treatment. 2018 update. 2018.<https://ginasthma.org/wp-content/uploads/2018/04/wms-GINA-2018-report-V1.3-002.pdf>.
- 4 Porsbjerg CM, Menzies-Gow AN, Tran TN, *et al.* Global Variability in Administrative Approval Prescription Criteria for Biologic Therapy in Severe Asthma. *J Allergy Clin Immunol Pract* 2022;**10**:1202–16. doi:10.1016/j.jaip.2021.12.027
